# Supplementary material for: Effect of Different Physical Cross-Linkers on Drug Release from Hydrogel Layers Coated on Magnetically Steerable 3D-Printed Microdevices
Source: MDPI journal article supplement (doi:10.3390/technologies9020043), 2021-06-18
Supplement: s1 [file s1]

Archive with 5 entries (5 files):
- Supplementary Video 1.mp4
- Supplementary Video 2.mp4
- Supplementary Video 3.mp4
- Supplementary Video 4.mp4
- Supplementary_Material_Bernasconi.pdf
